# Supplementary material for: Synthesis of nonaromatic [16]thiatriphyrin(2.2.1)s
Source: Royal Society of Chemistry journal article supplement (doi:10.1039/d4ob02105c), 2025-01-01
Supplement: d4ob02105c1.pdf [file d4ob02105c1.pdf]

## Supporting Information

### Synthesis of Nonaromatic [16]Thiatriphyrin(2.2.1)s

Shubham Tiwari and Mangalampalli Ravikanth\*

Department of Chemistry, IIT Bombay, Powai, Mumbai 400076,

India

Email: [ravikanth@chem.iitb.ac.in](mailto:ravikanth@chem.iitb.ac.in)

| Sr. no | Details                                                                                                                               | Page no. |
|--------|---------------------------------------------------------------------------------------------------------------------------------------|----------|
| 1      | General experimental and computational details.                                                                                       | S2-S3    |
| 2      | <b>Figures S1-S18.</b> Characterization (HRMS and NMR) data for all new compounds.                                                    | S3-S19   |
| 3      | <b>Figure S19.</b> Comparison of absorption spectra of the compounds <b>4-6</b> free base and in presence of TFA (excess).            | S20      |
| 4      | <b>Figure S20.</b> Electrochemical data for the compounds <b>4-6</b> .                                                                | S21      |
| 5      | <b>Figure S21.</b> Ground state optimized structures of <b>4</b> and <b>4.H<sup>+</sup></b> .                                         | S21      |
| 6      | <b>Figure S22.</b> NICS values of compound <b>4</b> and its protonated derivative <b>4.H<sup>+</sup></b> .                            | S22      |
| 7      | <b>Table S1-S2.</b> Cartesian coordinates of the optimized ( $S_0$ ) geometries of the compound <b>4</b> and <b>4.H<sup>+</sup></b> . | S22-S25  |
| 8      | References.                                                                                                                           | S25      |

## General Experimental

All chemicals such as  $\text{BF}_3 \cdot \text{OEt}_2$ , 2,3-dichloro-5,6-dicyano-1,4-benzoquinone (DDQ) were procured and used as received from Aldrich. Neutral alumina and silica gel (60-120 mesh) column chromatographic technique performed for purification purposes. The 1D, 2D &  $^{13}\text{C}\{^1\text{H}\}$  NMR spectra were recorded in  $\text{CDCl}_3$  on Bruker 400 and 500 MHz instruments. The  $^{13}\text{C}$  NMR frequencies are 125.77 and 100.06 MHz for 500 MHz and 400 MHz instruments respectively. Shimadzu UV-Vis-NIR Spectrophotometer was used for absorption spectral studies of compounds **4-6**. Cyclic voltammetry (CV) studies were carried out with BASi C3 Cell Stand electrochemical system (Manufacturer: Bioanalytical Systems, Inc.) utilizing the three-electrode configuration consisting of a glassy carbon (working electrode), platinum wire (auxiliary electrode) and saturated calomel as reference electrode (the electrode is composed of  $\text{Hg}/\text{Hg}_2\text{Cl}_2/\text{Saturated KCl}$  solution). The experiments were done in dry dichloromethane using 0.1 M tetrabutylammonium perchlorate as supporting electrolyte. The initial and final potential was at 0 V, first switching potential at -2.0 V and second switching potential at 2.0 V. Glassy carbon-disk working electrodes (3-mm diameter, part # CHI 104) were purchased from CH Instruments, Inc. Bruker maXis Impact and LC-MS Q-TOF micro mass spectrometer instrument were used for recording HR mass spectra.

## Computational Details

Geometry of compound **4** and **4.H<sup>+</sup>** were optimized by using Gaussian 09 program package.<sup>1</sup> For both the compounds **4** and **4.H<sup>+</sup>**, the B3LYP/6-31G(d,p)<sup>2</sup> basis set was used for the density functional theory (DFT)<sup>3</sup> for optimization in  $S_0$  state. To substantiate genuine global minimum energy structures the frequency calculations were performed on  $S_0$  optimized geometries.

The optimized geometries used to obtain frontier molecular orbitals (FMOs) and also subjected to TD-DFT calculations for the first 50  $S_0 \rightarrow S_n$  transitions<sup>4</sup> to understand absorption properties of macrocycle **4** and **4.H<sup>+</sup>**. The integral equation formalism polarizable continuum model (PCM)<sup>5</sup> within the self-consistent reaction field (SCRF) theory was used in the TD-DFT calculations.

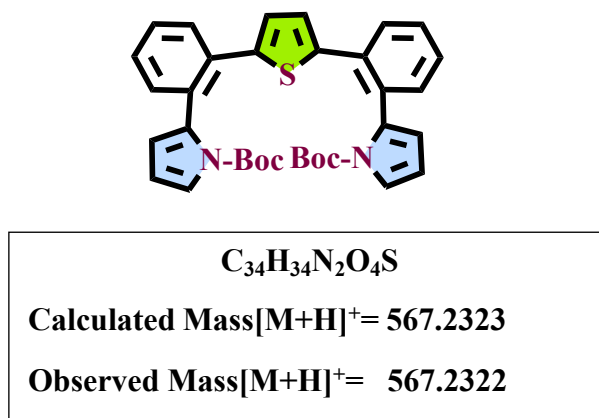

## Compound Details

Cpd. 1: C<sub>34</sub>H<sub>34</sub>N<sub>2</sub>O<sub>4</sub>S

| Formula                                                         | m/z      | Observed M/Z    | Difference Da    | Difference PPM  | Score |
|-----------------------------------------------------------------|----------|-----------------|------------------|-----------------|-------|
| C <sub>34</sub> H <sub>34</sub> N <sub>2</sub> O <sub>4</sub> S | 567.2323 | 567.23227672044 | 1.09664768854145 | 1.9367738339811 | 97.36 |

MassHunter Qualitative Analysis

Page 1 of 2

Generated at 13:03 on 26/08/2024

## Department of Chemistry I.I.T. (B)

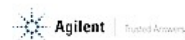

## Compound Spectra (Zoomed)

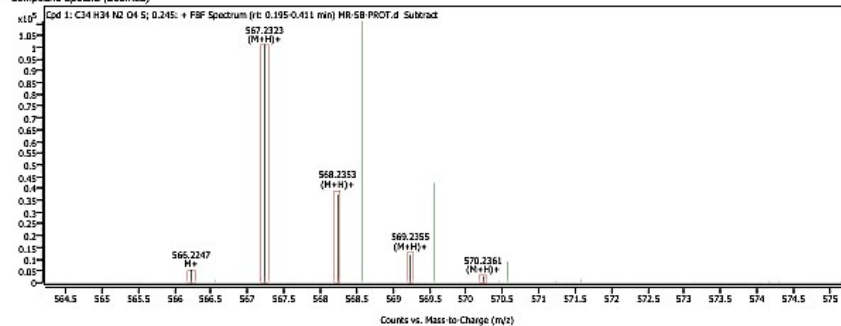MassHunter Qual 10.0  
(End of Report)

**Figure S1.** HR mass spectrum of the compound **8**.

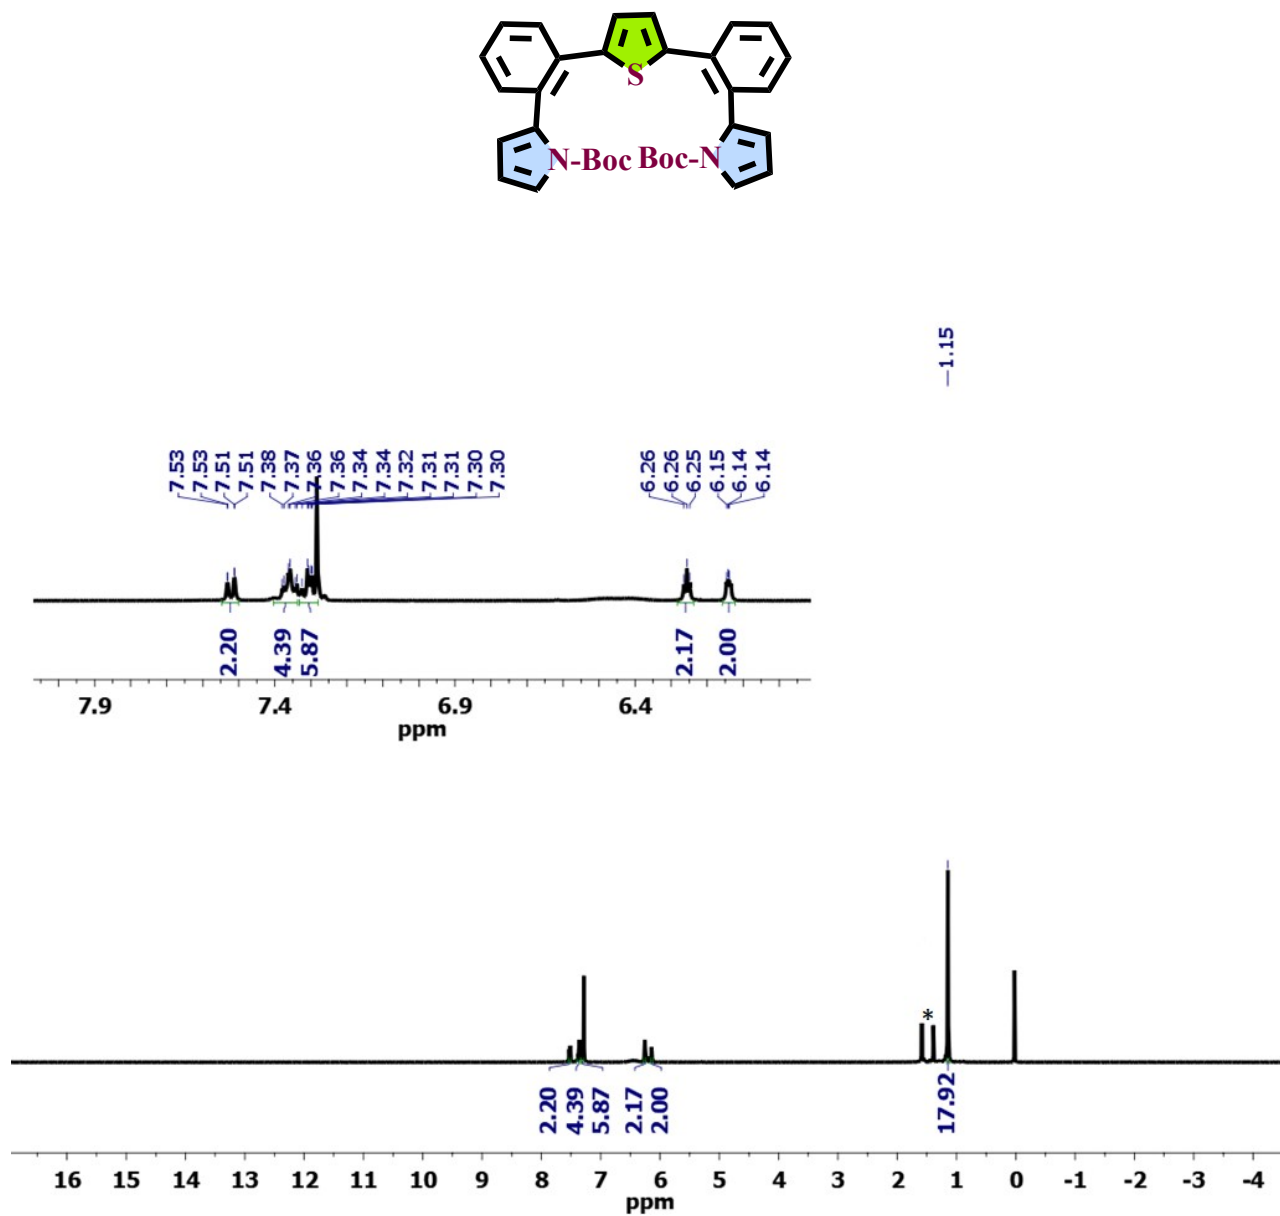

**Figure S2.**  $^1\text{H}$  NMR spectrum of the compound **8** recorded in  $\text{CDCl}_3$  at  $25^\circ\text{C}$  at 400 MHz NMR instrument. Asterisk indicates the solvent peaks.

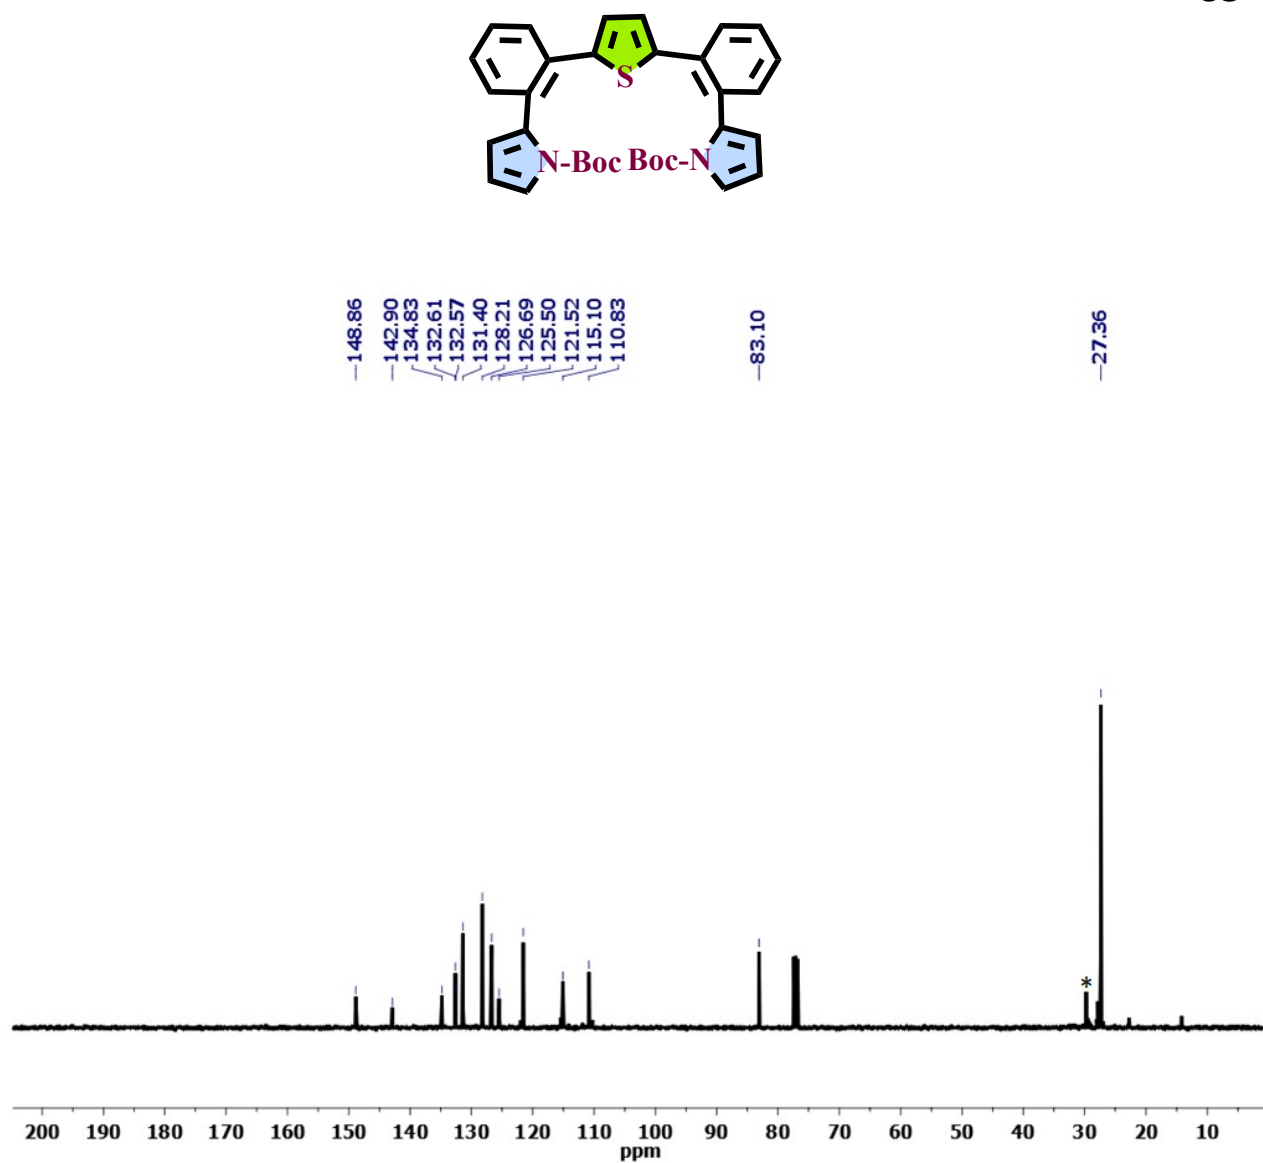

**Figure S3.**  $^{13}\text{C}\{^1\text{H}\}$  NMR spectrum of the compound **8** recorded in  $\text{CDCl}_3$  at  $25^\circ\text{C}$  at 400 MHz NMR instrument.

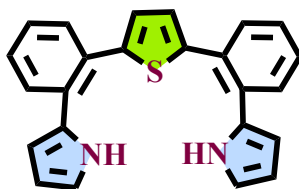

$$\text{C}_{24}\text{H}_{18}\text{N}_2\text{S}$$

Calculated Mass[M+Na]<sup>+</sup>= 367.1261

Observed Mass[M+Na]<sup>+</sup>= 367.1260

#### Compound Details

Cpd. 1: C<sub>24</sub>H<sub>18</sub>N<sub>2</sub>S

| Formula                                          | m/z      | Observed M/Z     | Difference Da      | Difference PPM     | Score |
|--------------------------------------------------|----------|------------------|--------------------|--------------------|-------|
| C <sub>24</sub> H <sub>18</sub> N <sub>2</sub> S | 367.1261 | 367.126092074437 | -0.174094458827767 | -0.475513223475608 | 97.48 |

#### Compound Spectra (Zoomed)

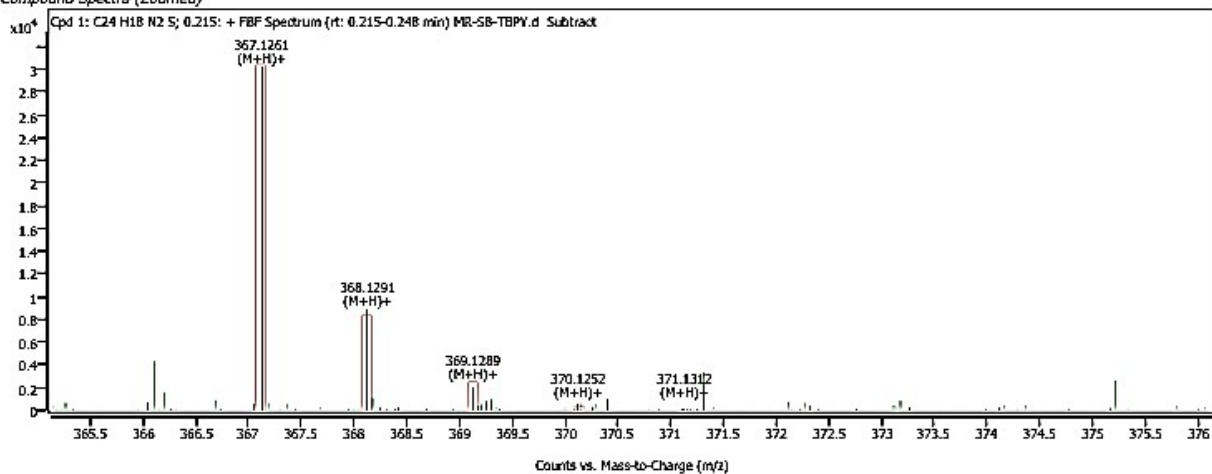

MassHunter Qual 10.0  
(End of Report)

Figure S4. HR mass spectrum of the compound 9.

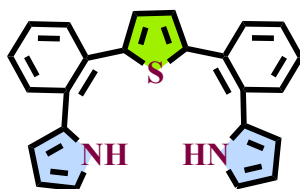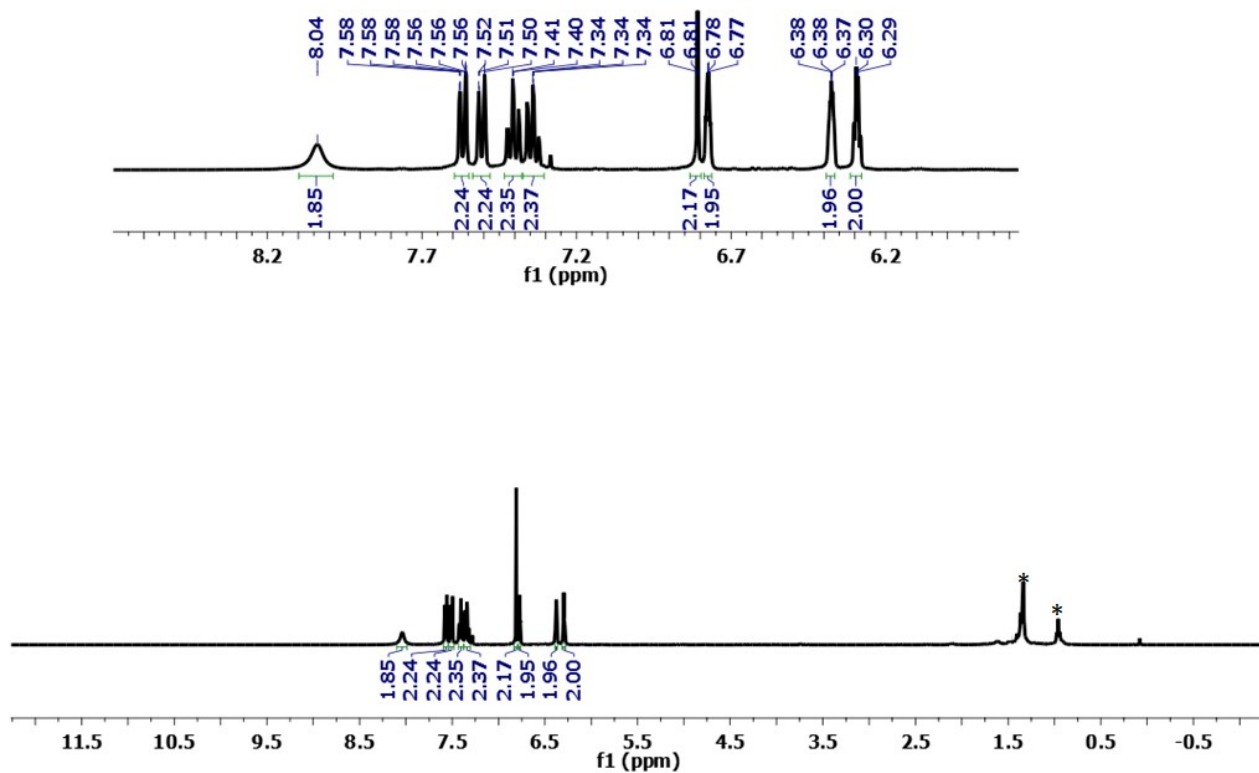

**Figure S5.** <sup>1</sup>H NMR spectrum of the compound **9** recorded in CDCl<sub>3</sub> at 25°C at 400 MHz NMR instrument. Asterisk indicates the residual solvent peaks.

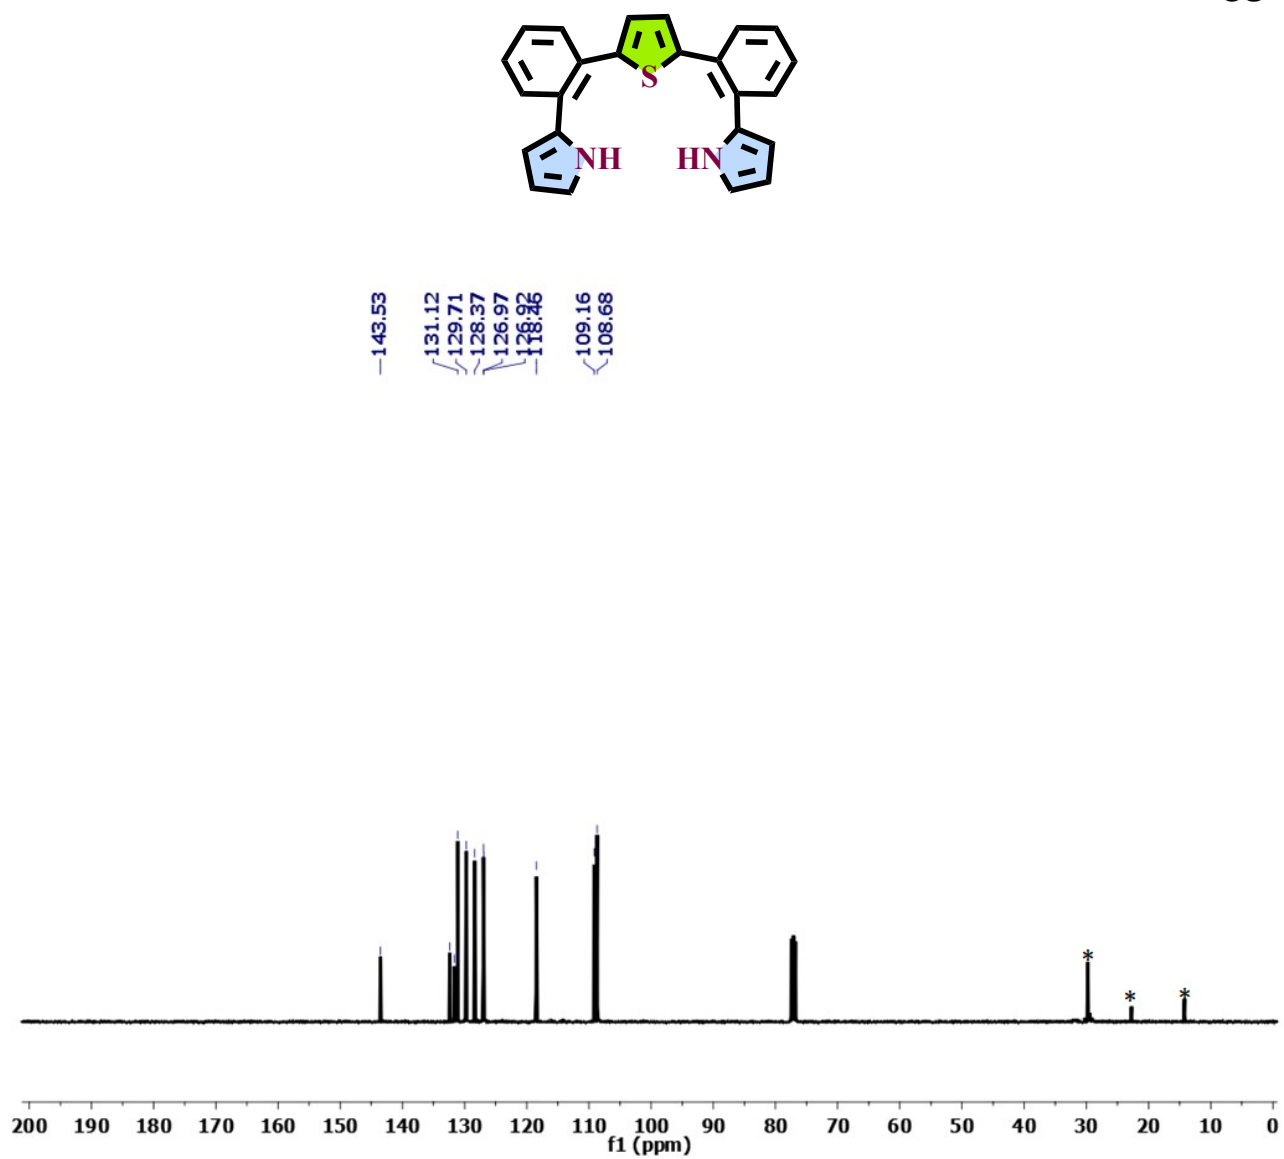

**Figure S6.**  $^{13}\text{C}\{^1\text{H}\}$  NMR spectrum of the compound **9** recorded in  $\text{CDCl}_3$  at  $25^\circ\text{C}$  at 400 MHz NMR instrument. Asterisk indicates the residual solvent peaks.



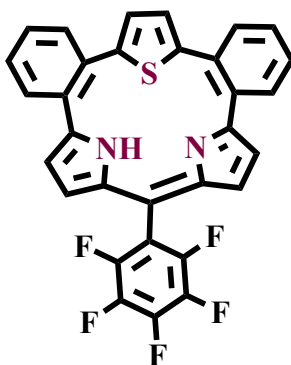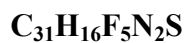

Calculated Mass[M+H]<sup>+</sup>= 543.0949

Observed Mass[M+H]<sup>+</sup>= 543.0944

DEPARTMENT OF CHEMISTRY, I.I.T.(B)

Analysis Info

Analysis Name D:\Data\AUG-2023\mr-tbpy.d  
 Method NaICsl\_pos\_1000-a.m  
 Sample Name mr-tbpy  
 Comment C31H15F5N2S

Acquisition Date 8/31/2023 3:37:58 PM

Operator PG SRD IN  
 Instrument maXis impact 282001.00081

Acquisition Parameter

|             |            |                      |          |                  |           |
|-------------|------------|----------------------|----------|------------------|-----------|
| Source Type | ESI        | Ion Polarity         | Positive | Set Nebulizer    | 0.3 Bar   |
| Focus       | Not active | Set Capillary        | 3700 V   | Set Dry Heater   | 180 °C    |
| Scan Begin  | 50 m/z     | Set End Plate Offset | -500 V   | Set Dry Gas      | 4.5 l/min |
| Scan End    | 1000 m/z   | Set Charging Voltage | 2000 V   | Set Divert Valve | Source    |
|             |            | Set Corona           | 0 nA     | Set APCI Heater  | 0 °C      |

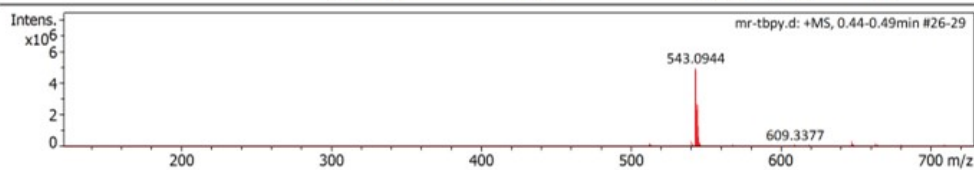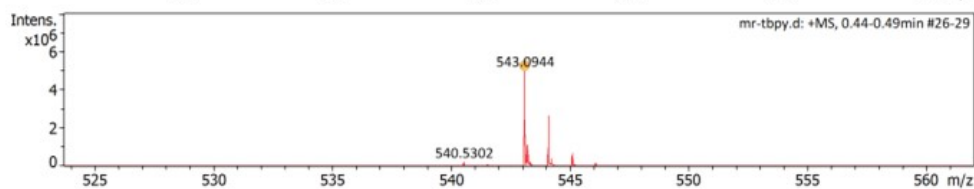

| Meas. m/z | # | Ion Formula | m/z      | err [ppm] | mSigma | # mSigma | Score  | rdb  | e <sup>-</sup> Conf | N-Rule |
|-----------|---|-------------|----------|-----------|--------|----------|--------|------|---------------------|--------|
| 543.0944  | 1 | C31H16F5N2S | 543.0949 | 0.8       | 93.6   | 1        | 100.00 | 25.0 | even                | ok     |

Figure S7. HR mass spectrum of the compound 4.

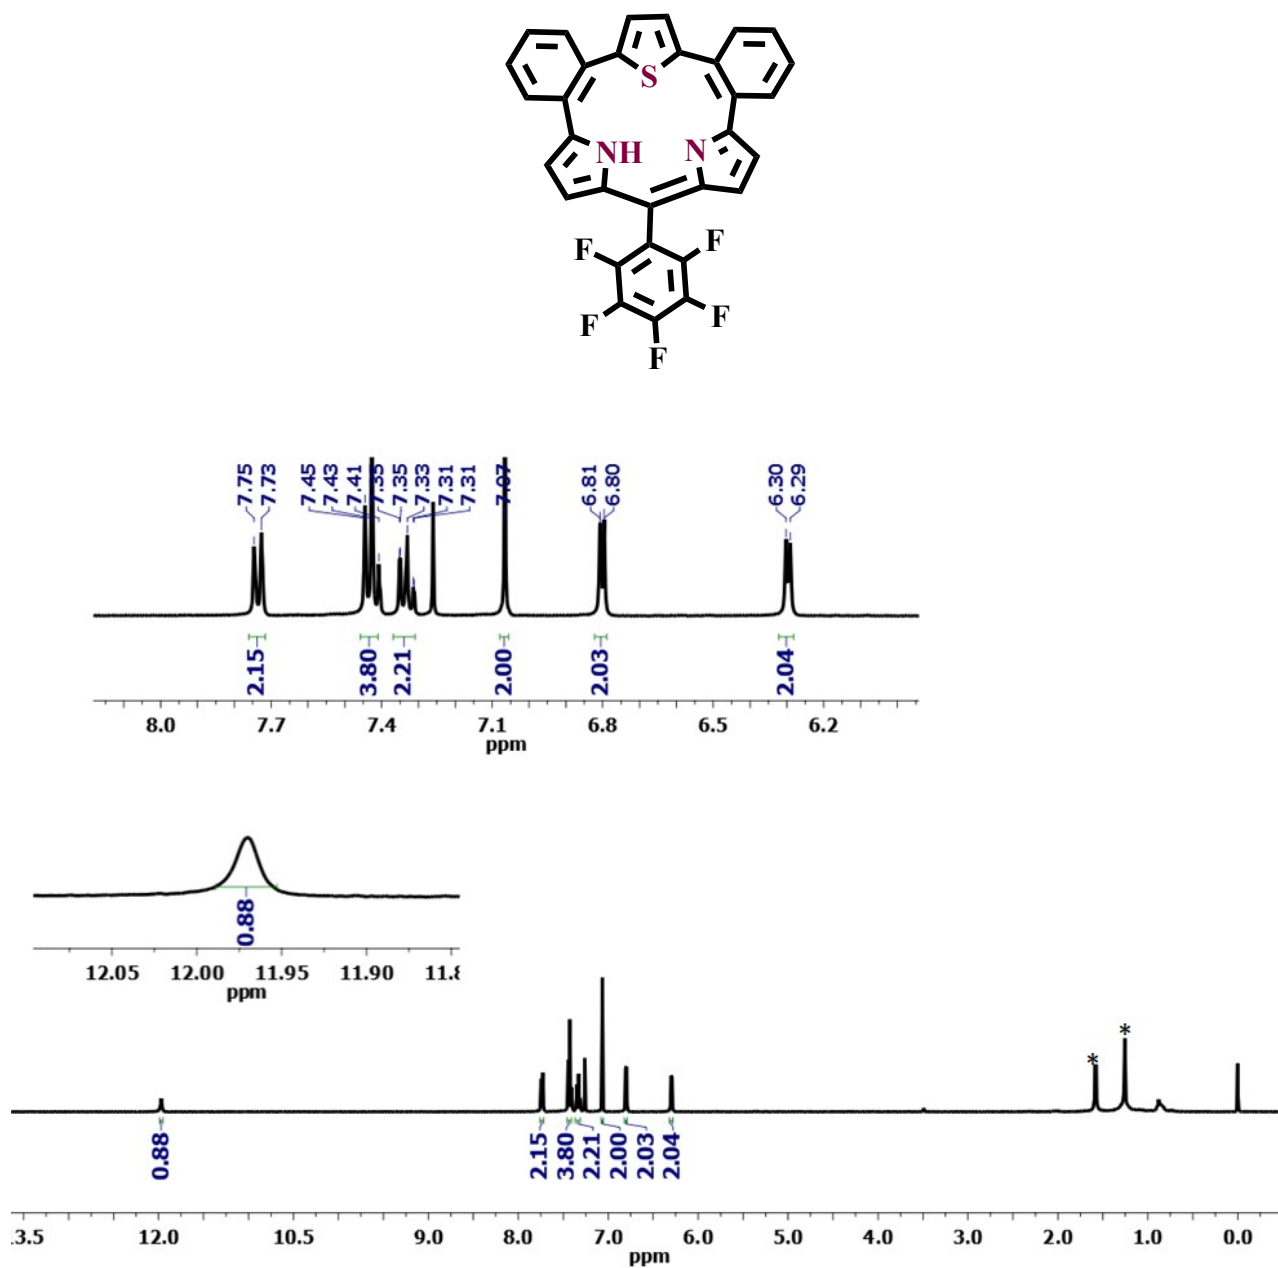

**Figure S8.**  $^1\text{H}$  NMR spectrum of the compound 4 recorded in  $\text{CDCl}_3$  at  $25^\circ\text{C}$  at 500 MHz NMR instrument. Asterisk indicates the residual solvent peaks.

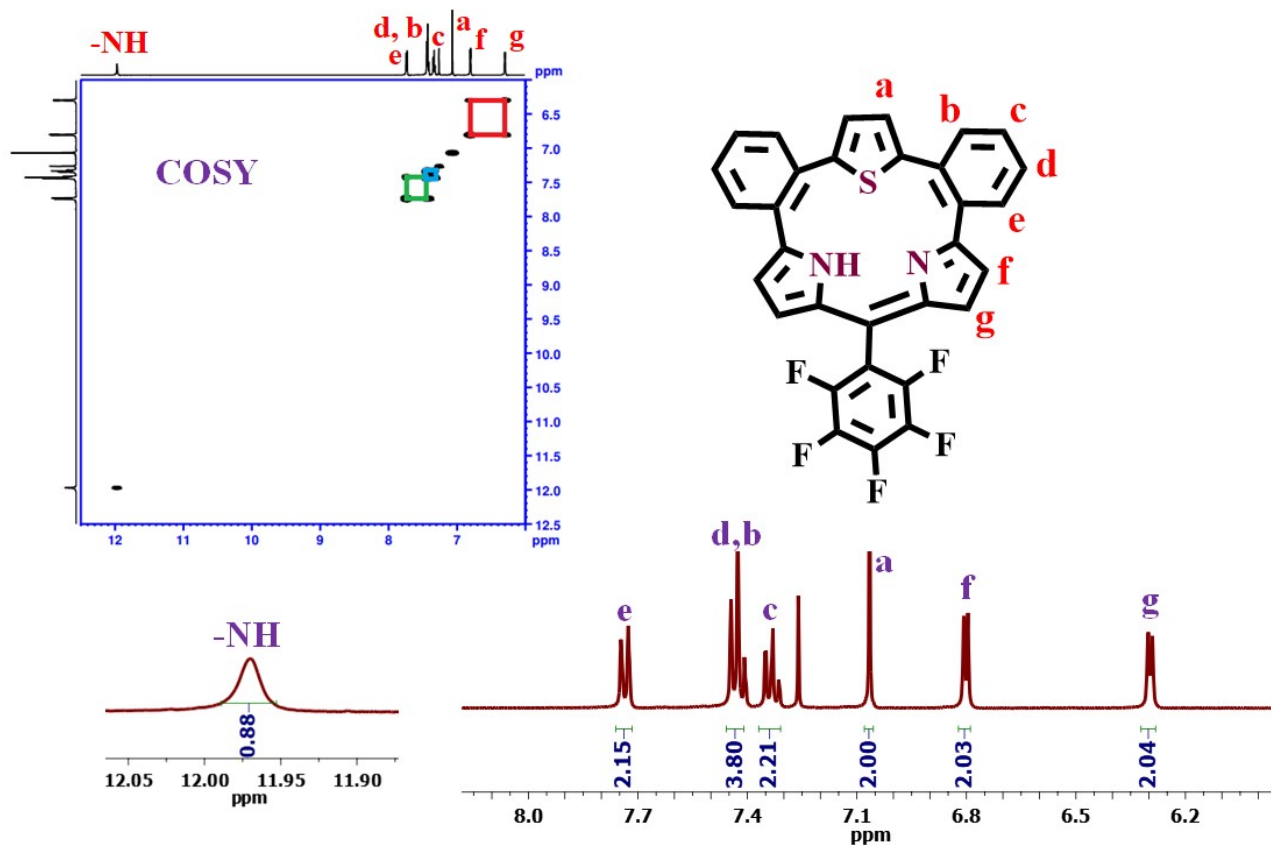

**Figure S9.** Partial  $^1\text{H}$  and  $^1\text{H}$ - $^1\text{H}$  COSY NMR spectrum of the compound **4** recorded in  $\text{CDCl}_3$  at  $25^\circ\text{C}$  at 400 MHz NMR instrument.

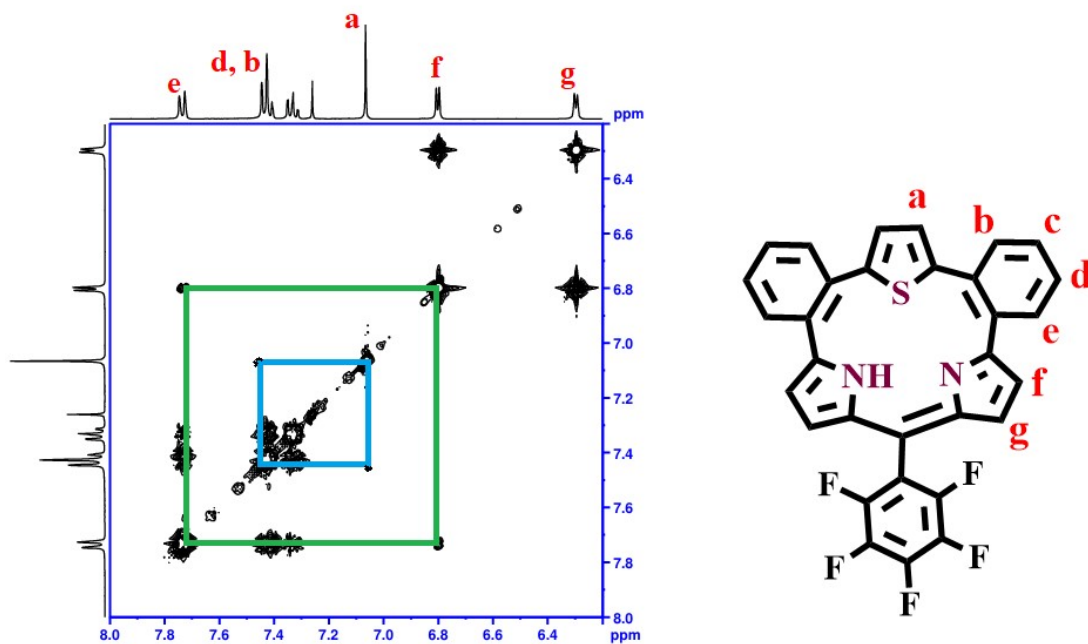

**Figure S10.**  $^1\text{H}$ - $^1\text{H}$  NOSY NMR spectrum of the compound **4** recorded in  $\text{CDCl}_3$  at  $25^\circ\text{C}$  at 400 MHz NMR instrument.

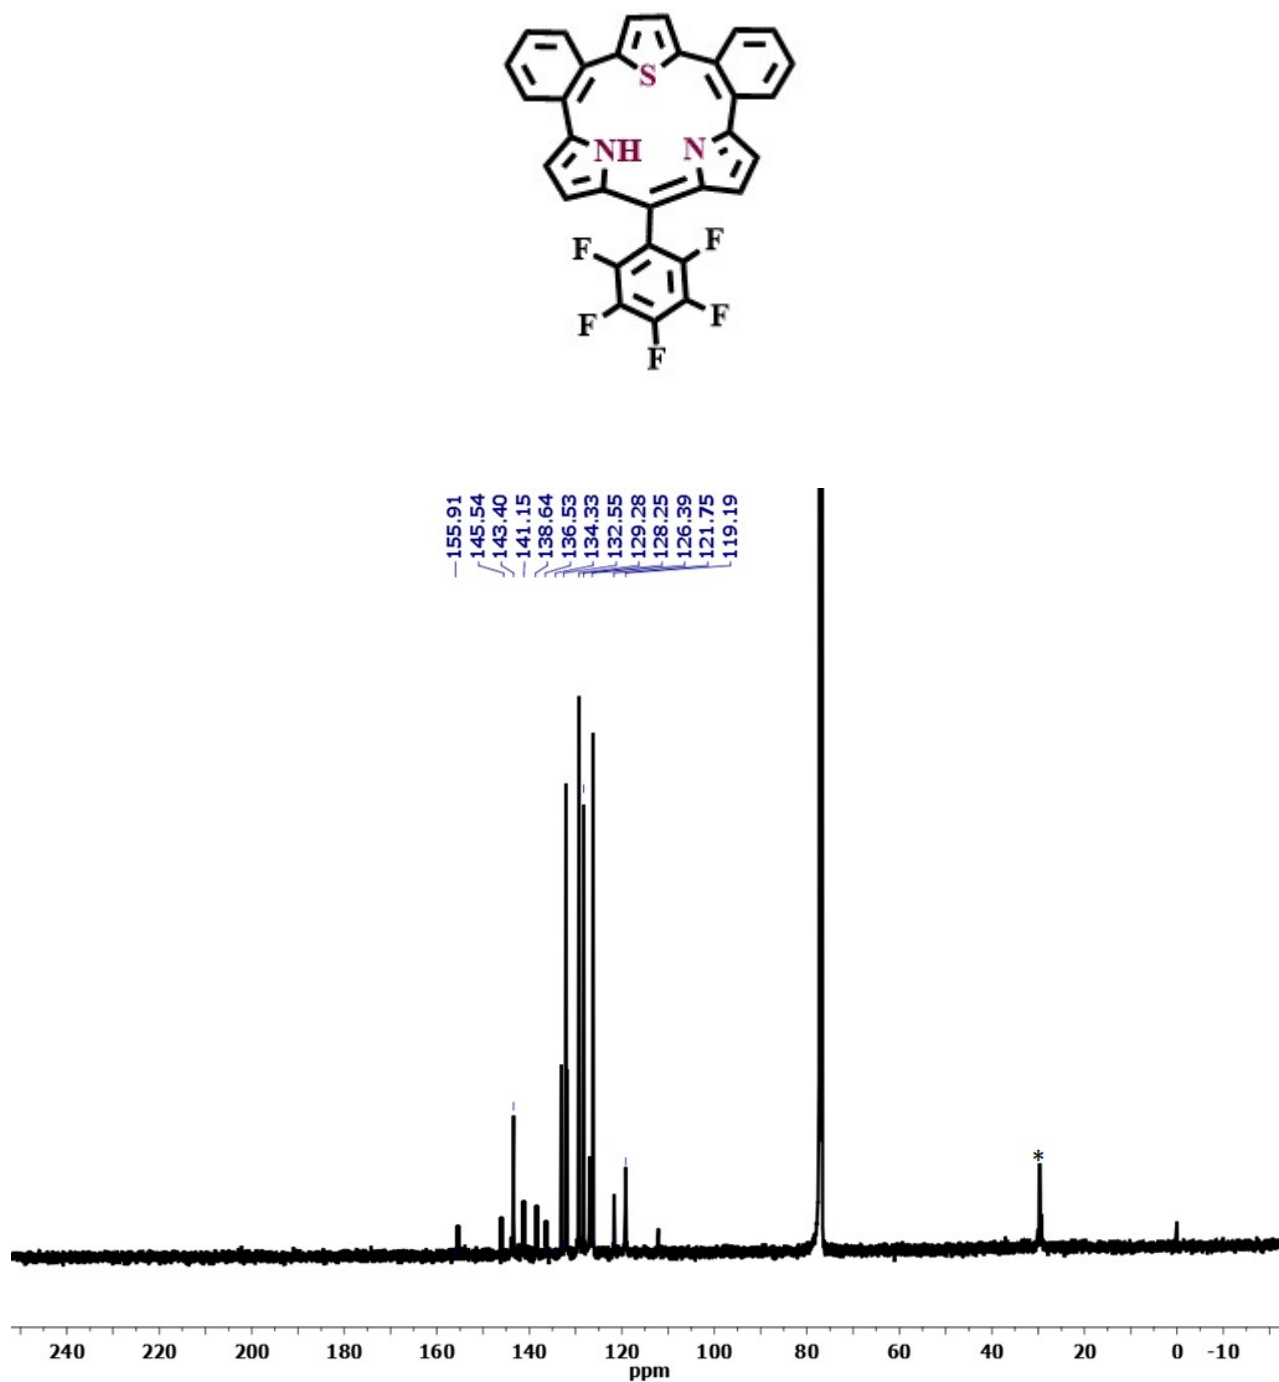

Figure S11.  $^{13}\text{C}\{^1\text{H}\}$  NMR spectrum of the compound 4 recorded in  $\text{CDCl}_3$  at  $25^\circ\text{C}$  at 400 MHz NMR instrument. The asterisk indicates the residual solvent peaks.

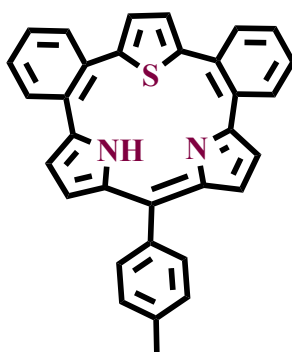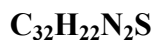

Calculated Mass[M+H]<sup>+</sup>= 467.1576

Observed Mass[M+H]<sup>+</sup>= 467.1585

DEPARTMENT OF CHEMISTRY, I.I.T.(B)

**Analysis Info**

Analysis Name D:\Data\OCT-2023\MR-SB-TOL-TBP.d  
 Method Naformat\_pos\_50-600.m  
 Sample Name MR-SB-TOL-TBP  
 Comment C32H22N2S

Acquisition Date 11/2/2023 3:44:26 PM

Operator PG-JS-OUT  
 Instrument maXis impact 282001.00081

**Acquisition Parameter**

|             |            |                      |          |                  |           |
|-------------|------------|----------------------|----------|------------------|-----------|
| Source Type | ESI        | Ion Polarity         | Positive | Set Nebulizer    | 0.3 Bar   |
| Focus       | Not active | Set Capillary        | 3700 V   | Set Dry Heater   | 180 °C    |
| Scan Begin  | 50 m/z     | Set End Plate Offset | -500 V   | Set Dry Gas      | 4.0 l/min |
| Scan End    | 650 m/z    | Set Charging Voltage | 2000 V   | Set Divert Valve | Source    |
|             |            | Set Corona           | 0 nA     | Set APCI Heater  | 0 °C      |

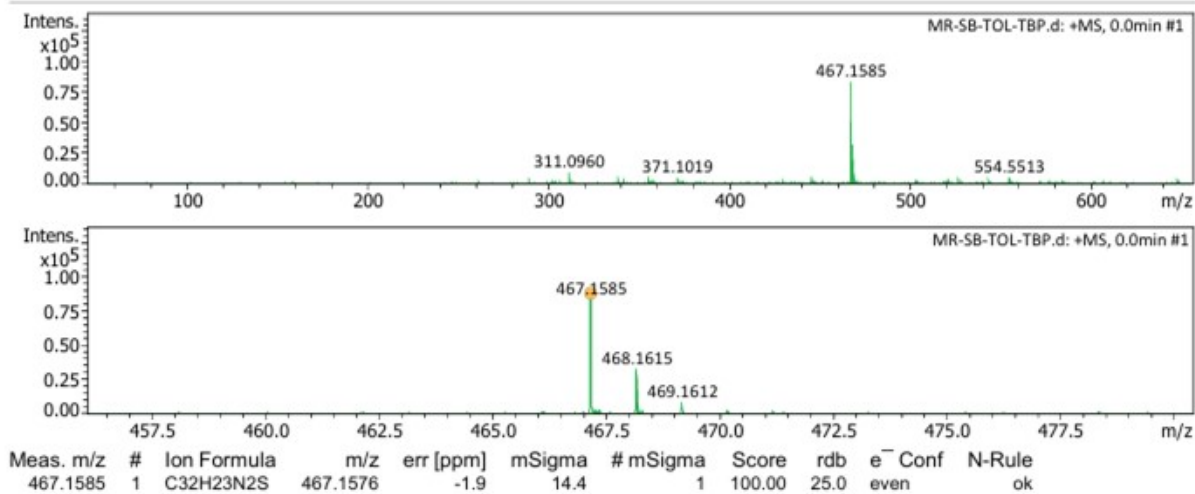

Figure S12. HR mass spectrum of the compound 5.

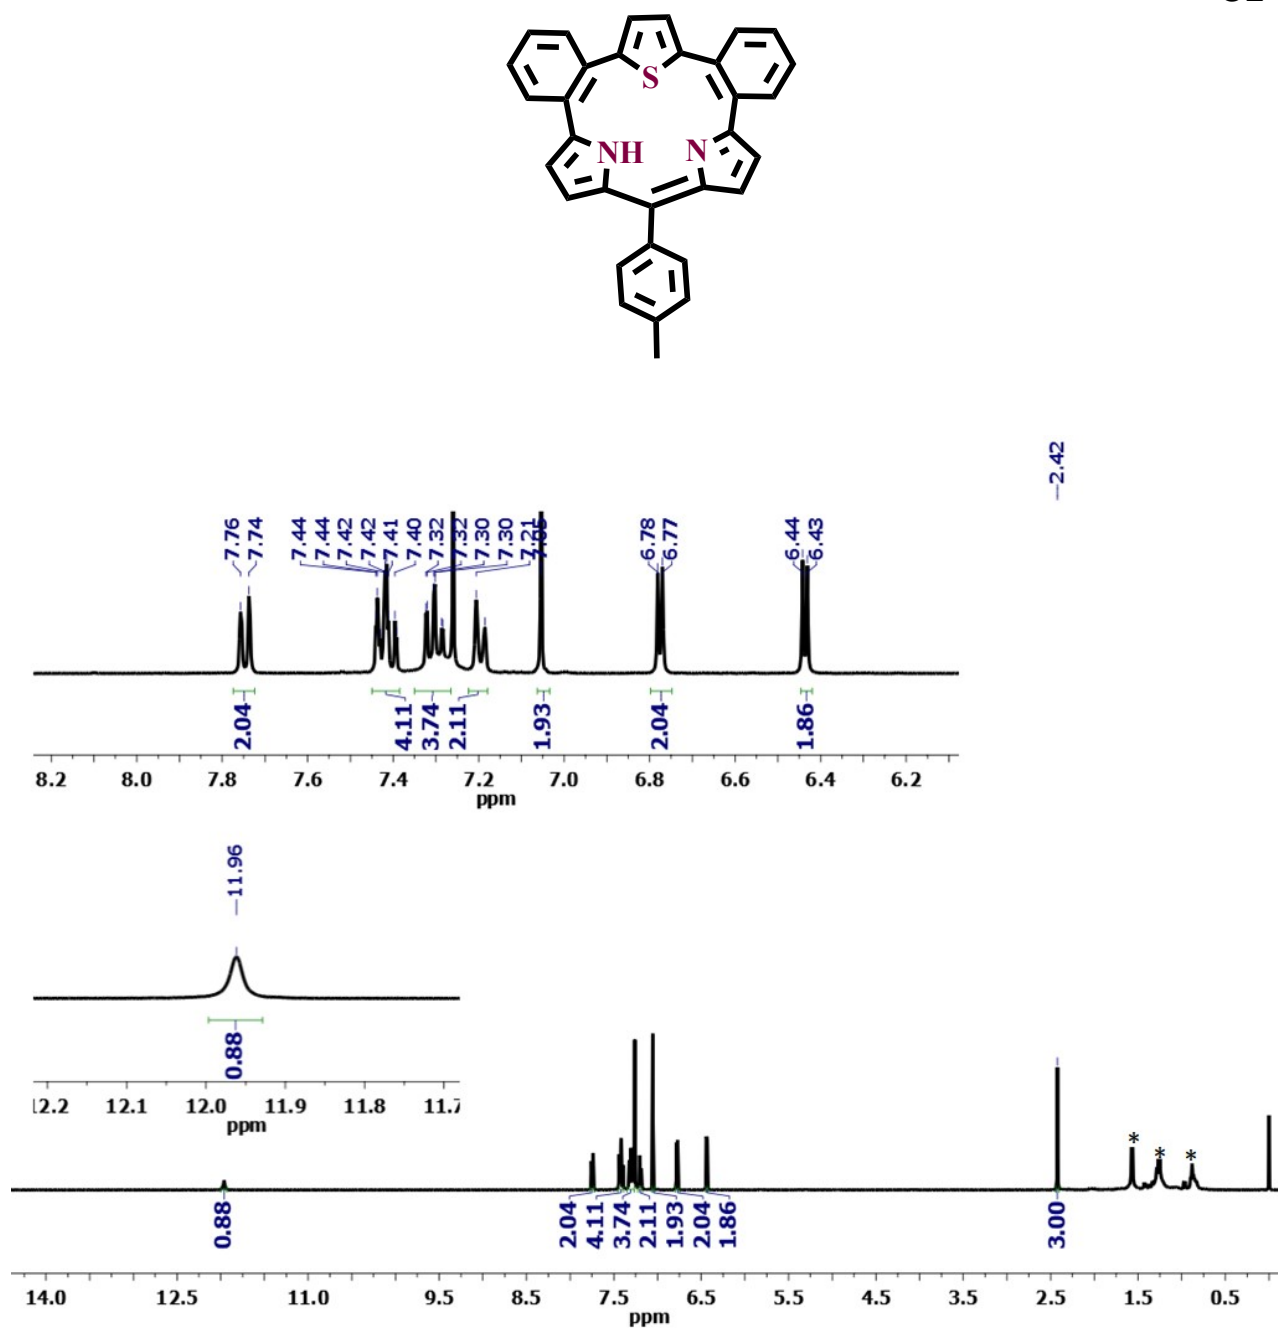

**Figure S13.**  $^1\text{H}$  NMR spectrum of the compound **5** recorded in  $\text{CDCl}_3$  at  $25^\circ\text{C}$  at 400 MHz NMR instrument. The asterisk indicates the residual solvent peaks.

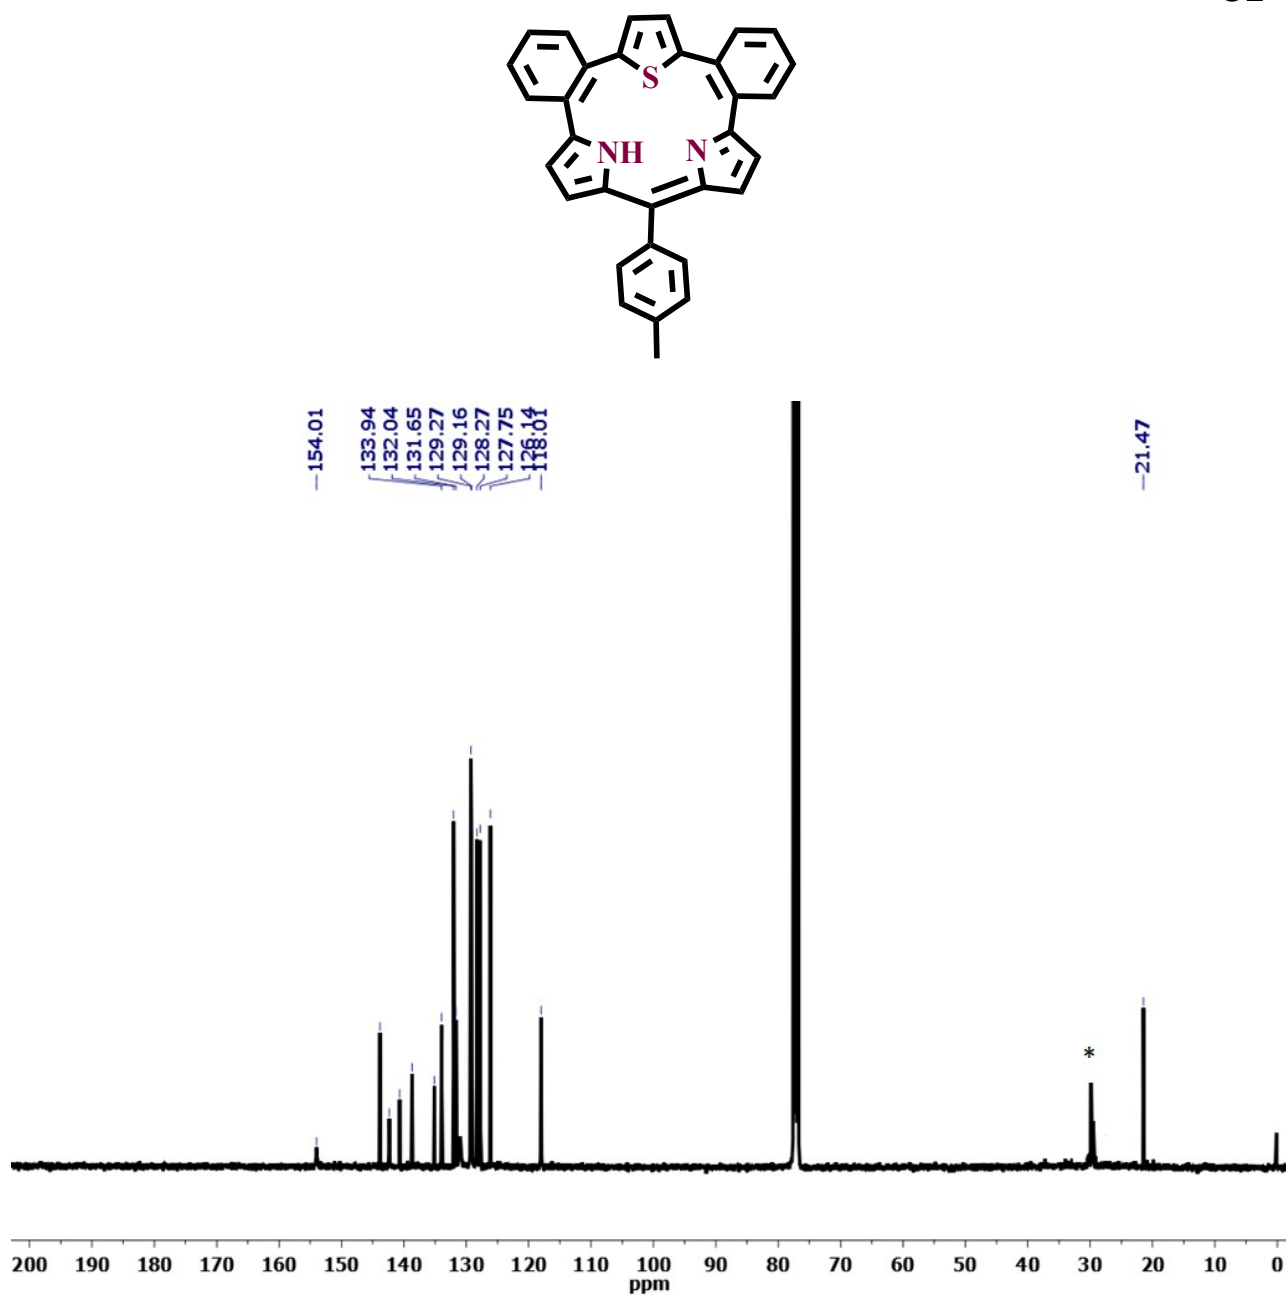

**Figure S14.**  $^{13}\text{C}\{^1\text{H}\}$  NMR spectrum of the compound **5** recorded in  $\text{CDCl}_3$  at 25°C at 400 MHz NMR instrument. The asterisk indicates the residual solvent peaks.

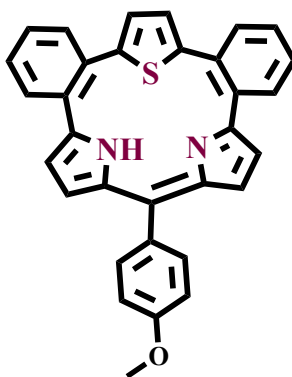

$$\text{C}_{32}\text{H}_{22}\text{N}_2\text{OS}$$

Calculated Mass[M+H]<sup>+</sup>= 483.1532

Observed Mass[M+H]<sup>+</sup>= 483.1533

#### Compound Details

Cpd. 1: C32 H22 N2 O S

| Formula        | m/z      | Observed M/Z    | Difference Da     | Difference PPM   | Score |
|----------------|----------|-----------------|-------------------|------------------|-------|
| C32 H22 N2 O S | 483.1533 | 483.15327261588 | 0.811306387845434 | 1.68270107507574 | 97.00 |

#### Compound Spectra (Zoomed)

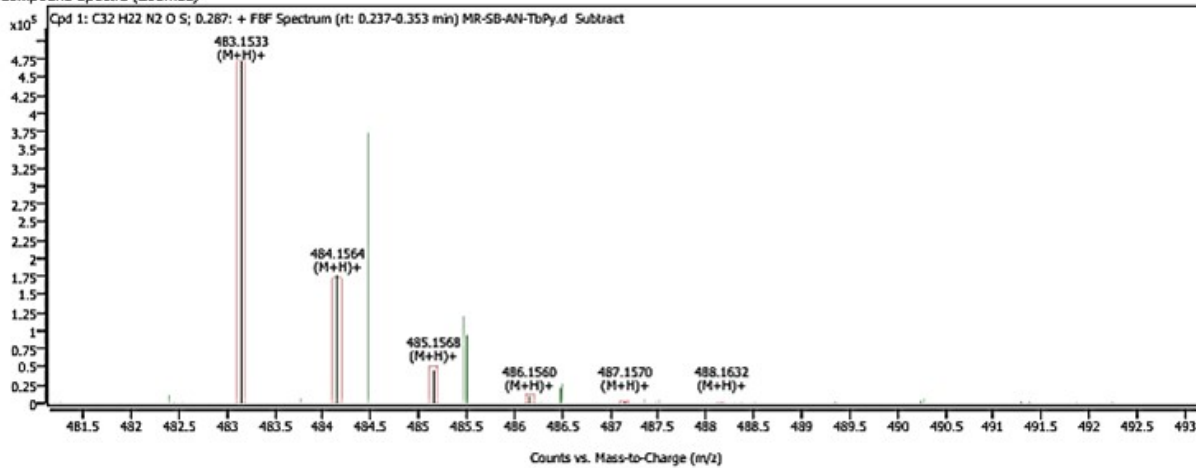

MassHunter Qual 10.0  
(End of Report)

Figure S15. HR mass spectrum of the compound 6.



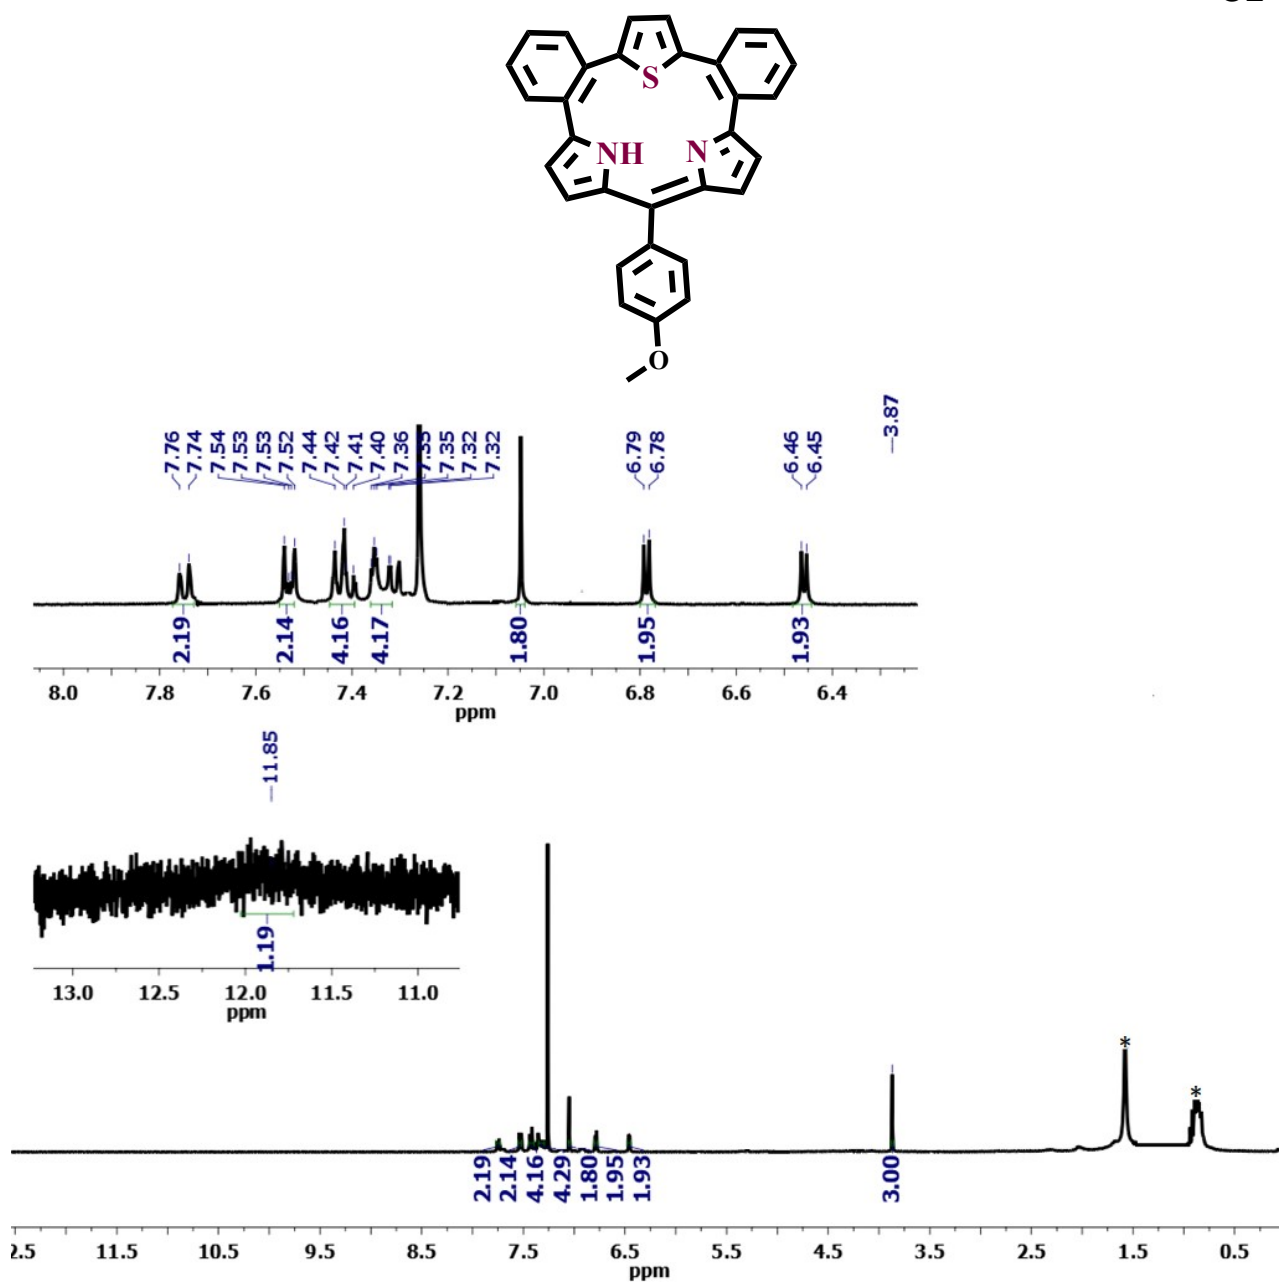

**Figure S16.**  $^1\text{H}$  NMR spectrum of the compound **6** recorded in  $\text{CDCl}_3$  at 25°C at 400 MHz NMR instrument. The asterisk indicates the residual solvent peaks.

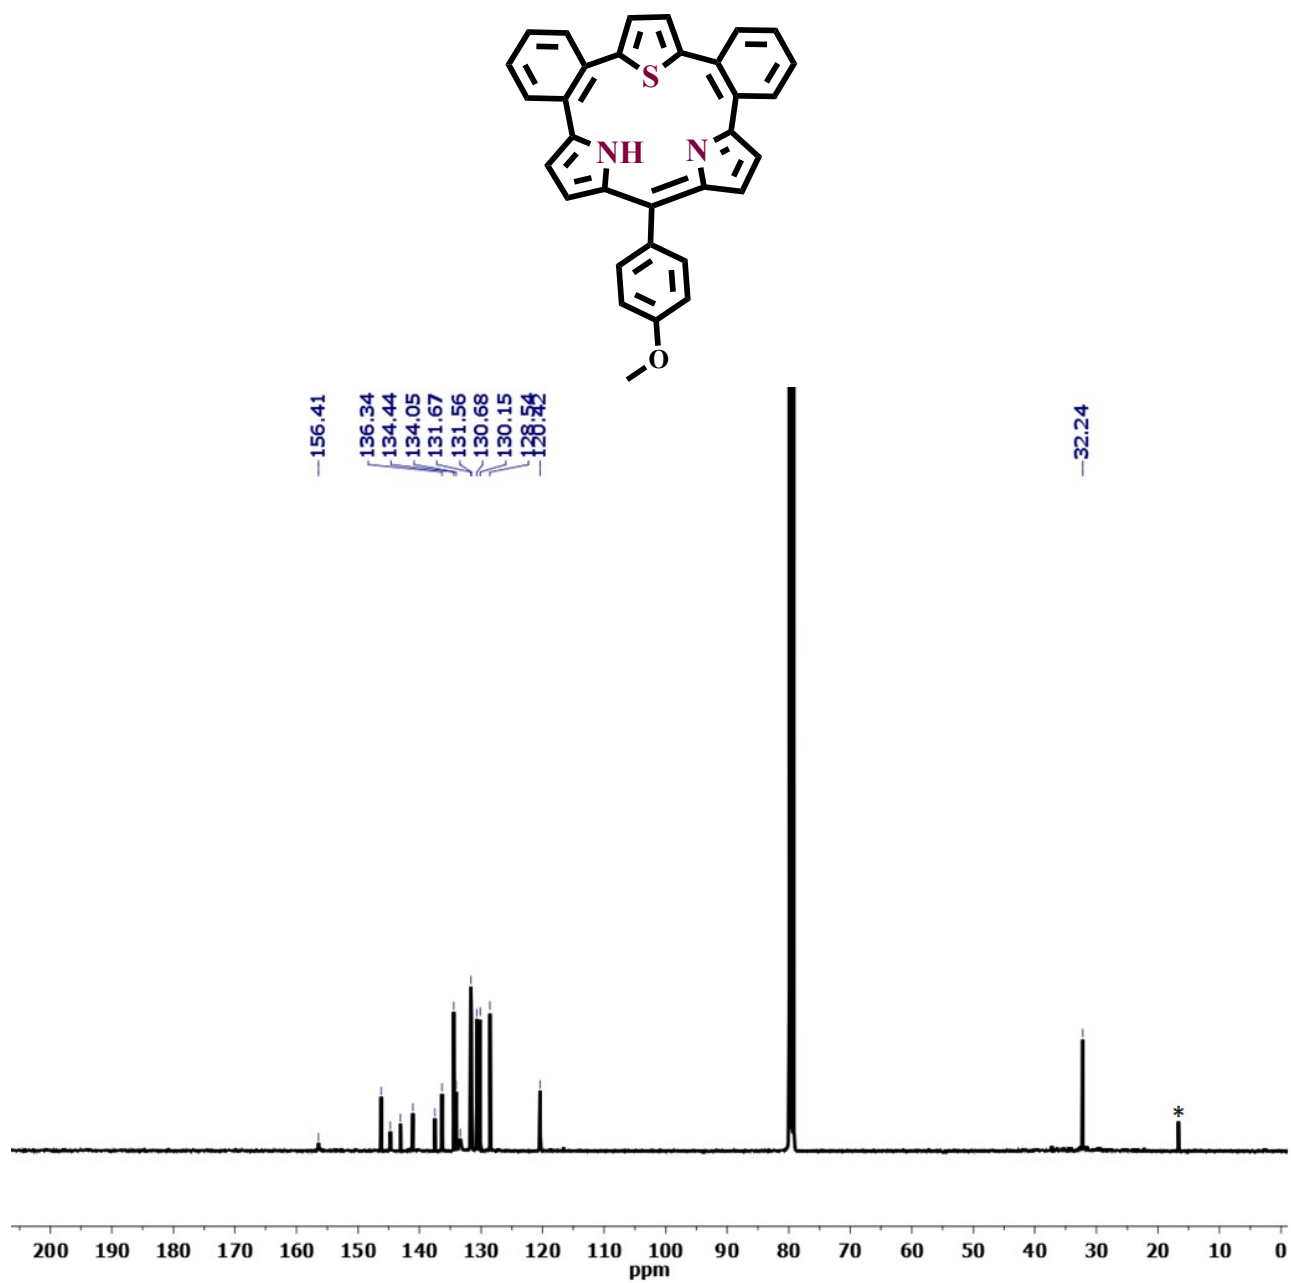

**Figure S17.** <sup>13</sup>C{<sup>1</sup>H} NMR spectrum of the compound **6** recorded in CDCl<sub>3</sub> at 25°C at 400 MHz NMR instrument. The asterisk indicates the residual solvent peaks.

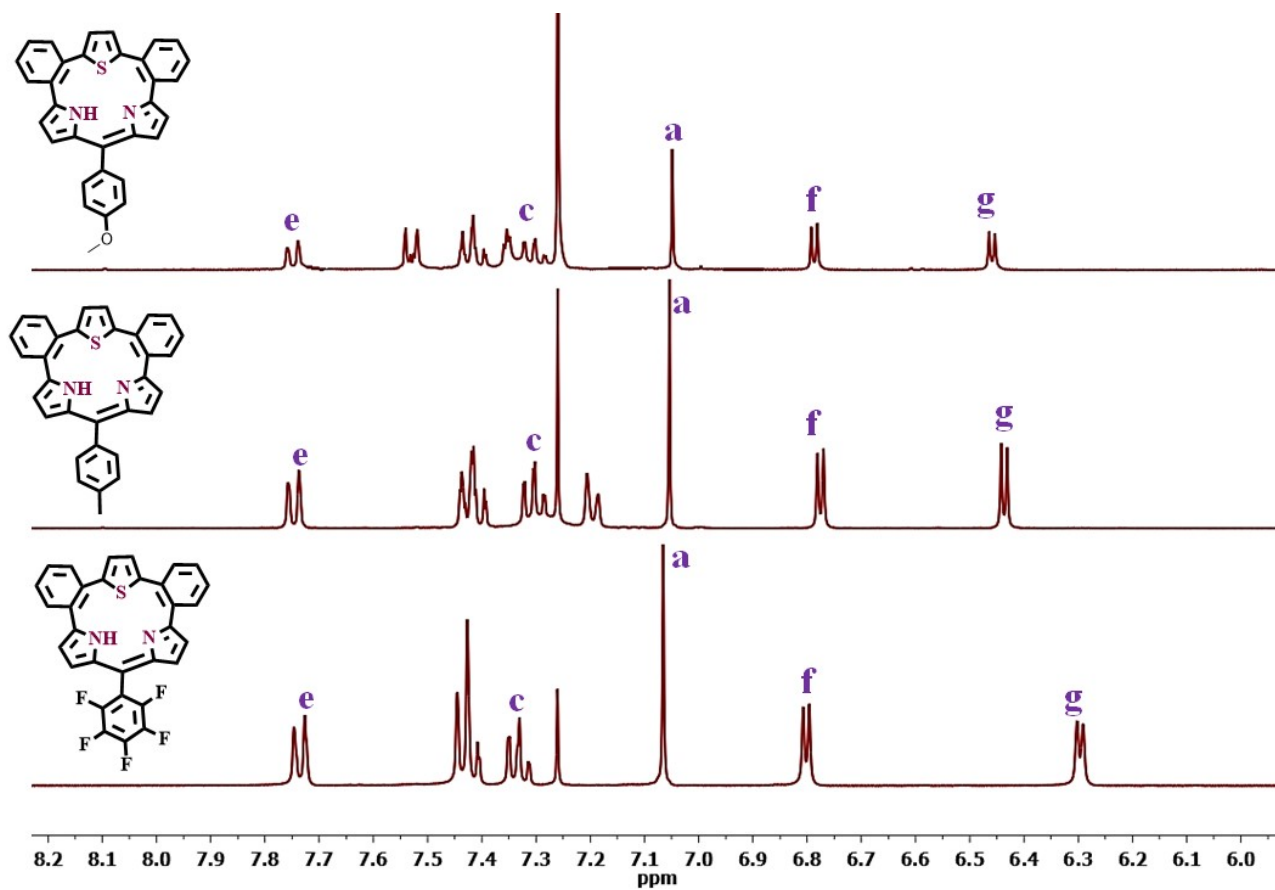

**Figure S18.** Comparison of  $^1\text{H}$  NMR spectrum of macrocycles 4-6.

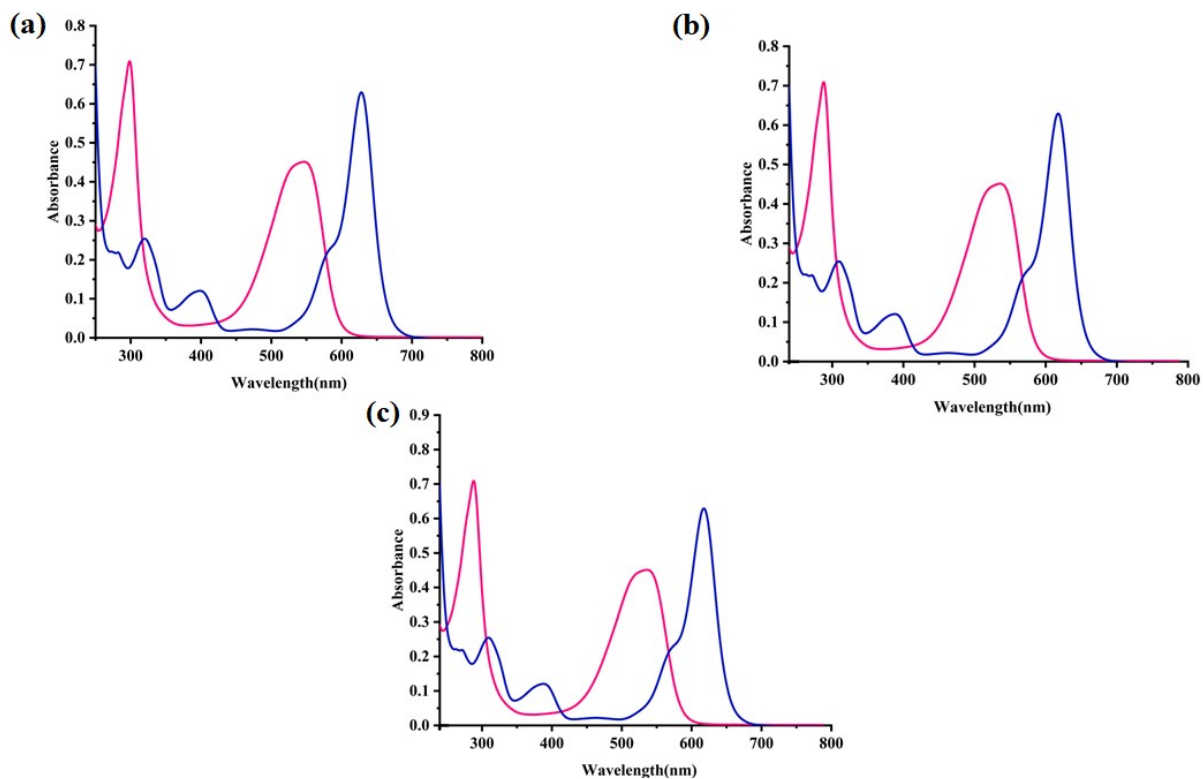

**Figure S19.** Comparison of UV-Vis absorption spectra of Macrocycles **4-6** free base (pink line) and in the presence of excess TFA (blue line) recorded in chloroform at 25°C.

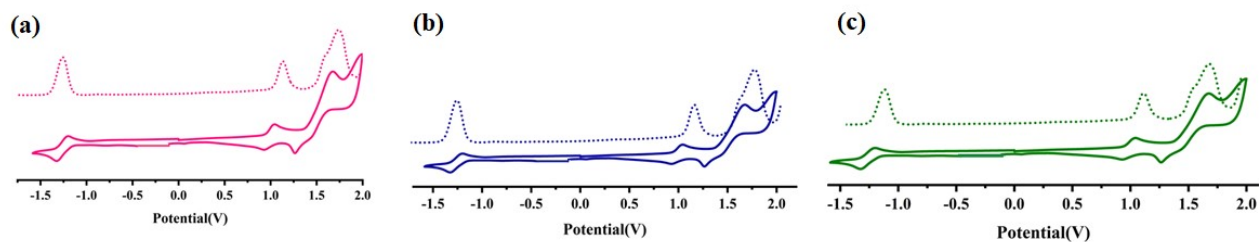

**Figure S20.** Cyclic voltammograms (colored lines) along with differential pulse voltammograms (dotted lines) of macrocycles **4-6** recorded in  $\text{CH}_2\text{Cl}_2$  containing 0.1 M TBAP as the supporting electrolyte and a saturated calomel electrode (SCE) as the reference electrode at scan rates of  $50 \text{ mVs}^{-1}$ .

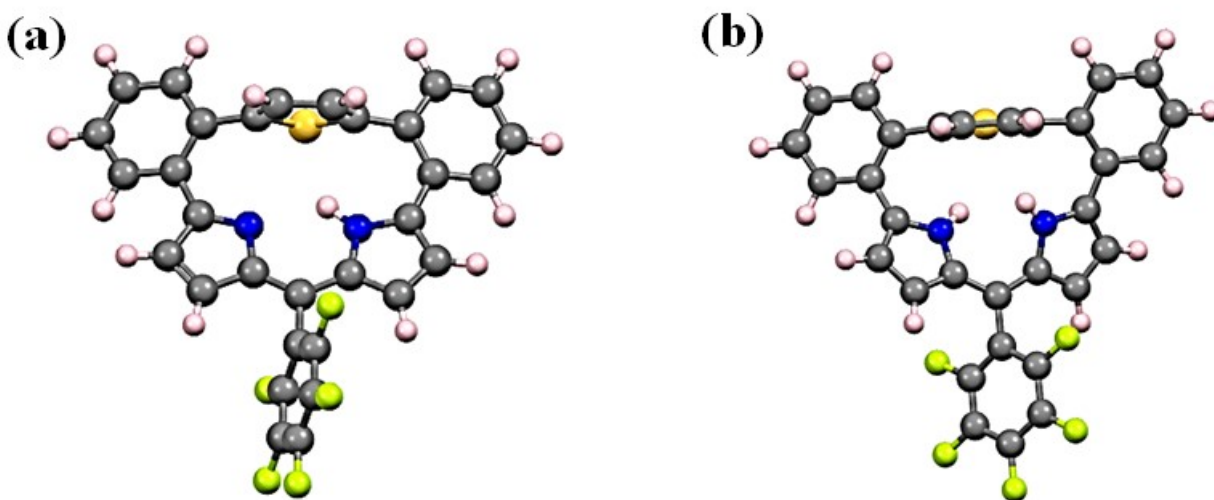

**Figure S21.** Ground state optimized structures of macrocycles **4** and **4.H<sup>+</sup>**.

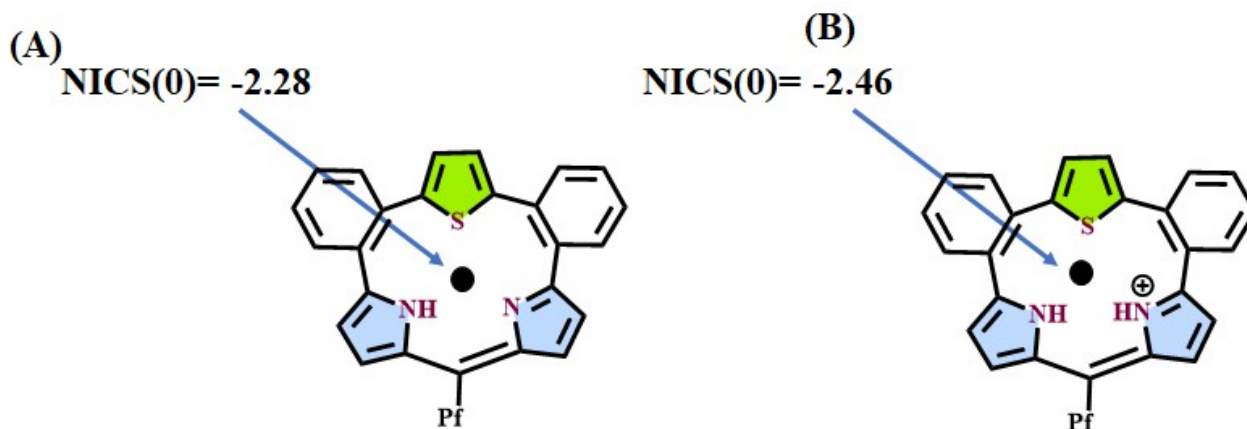

**Figure S22.** NICS values of compound **4** (A) and its protonated derivative **4.H<sup>+</sup>** (B) on the optimized structures (B3LYP/6-31g(d,p))(Black dots represent Bq atoms.)

**Table S1.** S<sub>0</sub> optimized geometry of the compound **4** at B3LYP/6-31g (d,p) level of theory

# Sum of imaginary frequencies= 0

| Atom | X        | Y        | Z        | Atom | X        | Y        | Z        |
|------|----------|----------|----------|------|----------|----------|----------|
| C    | 3.364572 | -1.24609 | 0.546149 | C    | -0.38843 | -3.45579 | -0.26677 |
| C    | 3.072969 | -0.75672 | 1.79236  | C    | -1.51448 | 0.019821 | -0.08169 |
| C    | 3.057081 | 0.669362 | 1.853526 | C    | -3.00871 | -0.01038 | -0.02587 |
| C    | 3.327936 | 1.26773  | 0.653134 | C    | -3.78668 | 0.424642 | -1.10356 |
| S    | 3.67243  | 0.068691 | -0.57025 | C    | -5.17907 | 0.400521 | -1.06426 |
| C    | 3.279819 | 2.700773 | 0.283472 | C    | -5.82719 | -0.07021 | 0.074726 |
| C    | 3.372729 | -2.64589 | 0.060922 | C    | -5.08019 | -0.5119  | 1.16419  |
| C    | 4.482296 | 3.416951 | 0.232386 | C    | -3.68933 | -0.47747 | 1.103229 |
| C    | 4.51634  | 4.765115 | -0.11934 | F    | -7.16135 | -0.0976  | 0.123016 |
| C    | 3.324954 | 5.416676 | -0.43262 | F    | -3.0033  | -0.9019  | 2.172448 |

**S23**

|   |          |          |          |   |          |          |          |
|---|----------|----------|----------|---|----------|----------|----------|
| C | 2.121817 | 4.719962 | -0.38353 | F | -5.7007  | -0.95934 | 2.261701 |
| C | 2.059293 | 3.35753  | -0.03036 | F | -5.89442 | 0.821908 | -2.11313 |
| C | 2.181776 | -3.31256 | -0.33567 | F | -3.19946 | 0.875889 | -2.21857 |
| C | 2.297947 | -4.6353  | -0.81088 | H | 2.84156  | -1.40074 | 2.633408 |
| C | 3.523237 | -5.28634 | -0.88524 | H | 2.804942 | 1.23274  | 2.74455  |
| C | 4.687001 | -4.62759 | -0.48907 | H | 5.40239  | 2.896278 | 0.47985  |
| C | 4.599984 | -3.31693 | -0.02702 | H | 5.462704 | 5.296365 | -0.15059 |
| C | 0.827201 | -2.74009 | -0.27047 | H | 3.329316 | 6.464044 | -0.7193  |
| C | 0.728658 | 2.715268 | -0.00064 | H | 1.206828 | 5.235927 | -0.6518  |
| C | -0.51962 | 3.462576 | 0.148837 | H | 1.407915 | -5.15164 | -1.15196 |
| C | -1.52363 | 2.546297 | 0.125091 | H | 3.568126 | -6.30369 | -1.26209 |
| C | -0.88427 | 1.25357  | -0.03631 | H | 5.650876 | -5.12384 | -0.54509 |
| N | 0.500403 | 1.412792 | -0.10676 | H | 5.495954 | -2.78733 | 0.281847 |
| N | 0.50243  | -1.41473 | -0.20903 | H | -0.61738 | 4.529439 | 0.292468 |
| C | -0.86694 | -1.24866 | -0.16942 | H | -2.58362 | 2.727433 | 0.234499 |
| C | -1.43357 | -2.53754 | -0.20752 | H | 1.117381 | -0.60365 | -0.20649 |
|   |          |          |          | H | -2.4898  | -2.76056 | -0.18737 |
|   |          |          |          | H | -0.48382 | -4.53097 | -0.27317 |

**Table S2.**  $S_0$  optimized geometry of the compound **4.H<sup>+</sup>** at B3LYP/6-31g (d,p) level of theory

# Sum of imaginary frequencies= 0

| Atom | X        | Y        | Z        | Atom | X        | Y        | Z        |
|------|----------|----------|----------|------|----------|----------|----------|
| C    | 3.344101 | -1.25624 | 0.468126 | C    | -0.27851 | -3.20783 | -1.24126 |
| C    | 3.241094 | -0.70038 | 1.719074 | C    | -1.54037 | 0.008865 | 0.001532 |
| C    | 3.253926 | 0.727671 | 1.717773 | C    | -3.01611 | -0.013   | 0.010318 |
| C    | 3.381882 | 1.274475 | 0.468863 | C    | -3.78604 | 0.917454 | -0.71098 |
| S    | 3.523618 | 0.006819 | -0.73869 | C    | -5.17743 | 0.90467  | -0.69813 |
| C    | 3.315821 | 2.706354 | 0.09223  | C    | -5.85439 | -0.0659  | 0.035941 |
| C    | 3.317103 | -2.69317 | 0.102989 | C    | -5.12883 | -1.01131 | 0.756563 |
| C    | 4.498154 | 3.387575 | -0.2273  | C    | -3.73824 | -0.97322 | 0.74215  |
| C    | 4.498385 | 4.753575 | -0.4996  | F    | -7.19088 | -0.09008 | 0.048736 |
| C    | 3.294876 | 5.459823 | -0.45357 | F    | -3.08977 | -1.88274 | 1.483198 |
| C    | 2.108594 | 4.795955 | -0.16339 | F    | -5.77406 | -1.93654 | 1.478961 |
| C    | 2.081846 | 3.412863 | 0.106229 | F    | -5.8694  | 1.804721 | -1.40906 |
| C    | 2.140372 | -3.34944 | -0.35811 | F    | -3.18702 | 1.847648 | -1.46748 |
| C    | 2.240796 | -4.7289  | -0.64795 | H    | 3.135157 | -1.30389 | 2.613994 |
| C    | 3.431932 | -5.42786 | -0.51406 | H    | 3.139659 | 1.334105 | 2.608861 |
| C    | 4.581754 | -4.77489 | -0.06482 | H    | 5.430711 | 2.831145 | -0.23433 |
| C    | 4.509379 | -3.41959 | 0.240622 | H    | 5.427713 | 5.260996 | -0.73874 |
| C    | 0.834791 | -2.71462 | -0.54654 | H    | 3.2769   | 6.525218 | -0.66321 |
| C    | 0.78295  | 2.790771 | 0.377129 | H    | 1.170192 | 5.340667 | -0.17459 |
| C    | -0.34369 | 3.338633 | 0.998542 | H    | 1.352032 | -5.26303 | -0.9639  |
| C    | -1.36863 | 2.383049 | 0.973039 | H    | 3.459366 | -6.48784 | -0.74884 |
| C    | -0.88075 | 1.23311  | 0.322578 | H    | 5.517161 | -5.31311 | 0.050603 |
| N    | 0.438879 | 1.509864 | -0.00389 | H    | 5.391398 | -2.89294 | 0.592299 |



|   |          |          |          |   |          |          |          |
|---|----------|----------|----------|---|----------|----------|----------|
| N | 0.459552 | -1.48115 | -0.04361 | H | -0.38545 | 4.316065 | 1.457885 |
| C | -0.85908 | -1.19353 | -0.36481 | H | -2.35463 | 2.479343 | 1.403308 |
| C | -1.32087 | -2.28291 | -1.12616 | H | 0.99482  | 0.93563  | -0.62042 |
|   |          |          |          | H | 0.996169 | -0.97604 | 0.646332 |
|   |          |          |          | H | -2.29843 | -2.34949 | -1.58072 |
|   |          |          |          | H | -0.30842 | -4.12646 | -1.80834 |

**References:**

- 1 O. Treutler and R. Ahlrichs, *J. Chem. Phys.*, 1995, **102**, 346–354.
- 2 C. Xiii, F. Component, L. Radom, W. J. Hehre and J. A. Pople, 1971, **4064**, 2371–2381.
- 3 A. D. Becke, *J. Chem. Phys.*, 1993, **98**, 1372–1377.
- 4 J. Tomasi, B. Mennucci and R. Cammi, *Chem. Rev.*, 2005, **105**, 2999–3093.
- 5 R. Bauernschmitt and R. Ahlrichs, *Chem. Phys. Lett.*, 1996, **256**, 454–464.
